# Supplementary material
Source: PubMed Central journal article supplement (PMC10217353)
Supplement: ehp10556.s001.acco.pdf [file ehp10556.s001.acco.pdf]

**Note to readers with disabilities:** *EHP* strives to ensure that all journal content is accessible to all readers. However, some figures and Supplemental Material published in *EHP* articles may not conform to [508 standards](#) due to the complexity of the information being presented. If you need assistance accessing journal content, please contact [ehp508@niehs.nih.gov](mailto:ehp508@niehs.nih.gov). Our staff will work with you to assess and meet your accessibility needs within 3 working days.

### **Supplemental Material**

#### **Source-Specific Air Pollution Including Ultrafine Particles and Risk of Myocardial Infarction: A Nationwide Cohort Study from Denmark**

Aslak Harbo Poulsen, Mette Sørensen, Ulla Arthur Hvidtfeldt, Jesper H. Christensen, Jørgen Brandt, Lise Marie Frohn, Matthias Ketznel, Christopher Andersen, and Ole Raaschou-Nielsen

#### **Table of Contents**

**Table S1.** Main categories of the Selected Nomenclature for Air Pollution (SNAP) classification used in the Danish emission inventory.

**Table S2.** Cohort (N=1,964,702) characteristics at baseline (last of: 1 January 2005 and age 50 years), above and below median of PM<sub>2.5</sub> and UFP concentration over previous 5 years, in Denmark, 2005-2017.

**Table S3.** Spearman rank correlations between 5-year time weighted average air pollution concentration at residences of all cohort members, Denmark, 2005-2017, N=1,964,702.

**Table S4.** Spearman rank correlations between area level socioeconomic factors and individual socioeconomic factors and air pollutant concentrations. Air pollution is 5-year time weighted average air pollution concentration at residences of each cohort member. Denmark, 2005-2017, N=1,964,702.

**Table S5.** Spearman rank correlations between 1, 5 and 10-year average air pollution concentration at residential addresses of all cohort members. Denmark, 2005-2017, N=1,964,702.

**Table S6.** Linear associations between MI and air pollutants, total and by source, per fixed unit. Fully adjusted model 3. Denmark, 2005-2017, N=1,964,702.

**Table S7.** Associations between MI and categories of air pollutants concentration: overall and by traffic or non-traffic sources. Denmark, 2005-2017, N=1,964,702.

**Table S8.** Associations between MI and categories of PM<sub>2.5</sub> from traffic, traffic-tailpipe and traffic-non-tailpipe. Denmark, 2005-2017, N=1,964,702.

**Table S9.** Akaike Information Criterion (AIC) analyses, comparing model fit of fully adjusted models (model 3) including five year average air pollutants either linearly or categorically. Model adjusted for age, sex, calendar period, marital status, education, occupational status, ethnicity, personal and household income and percentage of parish population: living in social housing, being sole providers, of non-western origin, having low income, being unemployed, having blue collar work, having only basic education and having a criminal record.

**Table S10.** Associations between air pollutants and MI; exposure calculated as running averages over the past 1, 5 and 10 years, expressed per IQR and per fixed unit increments. Denmark, 2005-2017, N=1,964,702.

**Table S11.** Sensitivity analysis of associations between MI (cases=71,285) and 5-year averages of air pollutants, total and by source. Denmark, 2005-2017, N=1,964,702. Person years: 18,309,319

**Table S12.** Annual contributions from different SNAP source categories to Danish air pollution in 2010. Note that contributions from ships have been singled out from SNAP 08: Other mobile sources and machinery.

**Figure S1.** Modelled (purple) and measured (red) UFP and NO<sub>2</sub> concentrations as average time variation at three timescales (day, year, week) at the street station HCAB (Copenhagen, Denmark, dense traffic, 2002-2016).

**Figure S2.** Year of entry for all cohort members. Year 2005 or age 50, whichever came first.

**Figure S3.** Distribution of PM<sub>2.5</sub>, UFP, BC and NO<sub>2</sub> concentrations as 5-year average over addresses held 2010 to 2014, by source: Danish road traffic versus other sources.

**Figure S4 a-d.** Associations between MI and 5-year time weighted averages of PM<sub>2.5</sub> (A), UFP (B), EC (C) and NO<sub>2</sub> (D) from non-traffic sources, specified both in categories and as linear variables in the fully adjusted model 3 (Adjusted for age, sex, calendar period, marital status, education, occupational status, ethnicity, personal and household income and percentage of parish population: living in social housing, being sole providers, of non-western origin, having low income, being unemployed, having blue collar work, having only basic education and having a criminal record) Categories defined from percentiles of exposure: <10% (reference), 10-25%, 25-50%, 50-75%, 75-90%, 90-95% and >95%, HRs and 95% confidence intervals are plotted at the median of each category. The linear estimates from Table 2 with 95% confidence intervals are plotted with the median of the categorical reference category as the null (i.e. =1). (Table S7 holds the same information in tabulated form).

**Figure S5 a-d.** Associations between MI and 5-year time weighted averages of PM<sub>2.5</sub> (A), UFP (B), EC (C) and NO<sub>2</sub> (D) from traffic sources, specified both in categories and as linear variables in the fully adjusted model 3 (Adjusted for age, sex, calendar period, marital status, education, occupational status, ethnicity, personal and household income and percentage of parish population: living in social housing, being sole providers, of non-western origin, having low income, being unemployed, having blue collar work, having only basic education and having a criminal record). Categories defined from percentiles of exposure: <10% (reference), 10-25%, 25-50%, 50-75%, 75-90%, 90-95% and >95%, HRs and 95% confidence intervals are plotted at the median of each category. The linear estimates from Table 2 with 95% confidence intervals are plotted with the median of the categorical reference category as the null (i.e. =1). (Table S7 holds the same information in tabulated form).

**Figure S6 a-b.** Associations between MI and 5-year time weighted averages of PM<sub>2.5</sub> from non-tailpipe (A) and tailpipe sources (B), specified both in categories and as linear variables in the fully adjusted model 3 (Adjusted for age, sex, calendar period, marital status, education, occupational status, ethnicity, personal and household income and percentage of parish population: living in social housing, being sole providers, of non-western origin, having low income, being unemployed, having blue collar work, having only basic education and having a criminal record). Categories defined from percentiles of exposure: <10% (reference), 10-25%, 25-50%, 50-75%, 75-90%, 90-95% and >95%, HRs and 95% confidence intervals are plotted at the median of each category. The linear estimates from Table 2 with 95% confidence intervals are plotted with the median of the categorical reference category as the null (i.e. =1). (Table S8 holds the same information in tabulated form).

**Figure S7.** Contributions from different SNAP source categories to Danish air pollution in 2010. Note that contributions from ships have been singled out from SNAP 08: Other mobile sources and machinery.

## References

**Table S1.** Main categories of the Selected Nomenclature for Air Pollution (SNAP) classification<sup>1</sup> used in the Danish emission inventory

|                 |                                                               |
|-----------------|---------------------------------------------------------------|
| SNAP categories |                                                               |
| SNAP 01         | Combustion in energy and transformation industries            |
| SNAP 02         | Non-industrial combustion plants                              |
| SNAP 03         | Combustion in manufacturing industry                          |
| SNAP 04         | Production processes                                          |
| SNAP 05         | Extraction/distribution of fossil fuels and geothermal energy |
| SNAP 06         | Solvents and other product use                                |
| SNAP 07         | Road transport                                                |
| SNAP 08         | Other mobile sources and machinery                            |
| SNAP 09         | Waste treatment and disposal                                  |
| SNAP 10         | Agriculture                                                   |
| SNAP 11         | Other sources and sinks                                       |

**Table S2.** Cohort (N=1,964,702) characteristics at baseline (last of: 1 January 2005 and age 50 years), above and below median of PM<sub>2.5</sub> and UFP concentration over previous 5 years, in Denmark, 2005-2017.

|                                                  | PM <sub>2.5</sub>               |                                   | Ultrafine particles                      |                                            |
|--------------------------------------------------|---------------------------------|-----------------------------------|------------------------------------------|--------------------------------------------|
|                                                  | 6.06-11.16<br>ug/m <sup>3</sup> | 11.16 -30.49<br>ug/m <sup>3</sup> | 3873-11 106<br>particles/cm <sup>3</sup> | 11 106-35 782<br>particles/cm <sup>3</sup> |
| Sample size (number)                             | 982 065                         | 982 637                           | 982 176                                  | 982 526                                    |
| <i>Individual level variables</i>                |                                 |                                   |                                          |                                            |
| Women [n (%)]                                    | 500 543 (51)                    | 536 545 (54)                      | 502 663 (51)                             | 534 425 (55)                               |
| Age (years) [median (10-90%)]                    | 55 (50-74)                      | 60 (50-77)                        | 50 (50-72)                               | 62 (50-78)                                 |
| Country of origin                                |                                 |                                   |                                          |                                            |
| Denmark                                          | 972 591 (99)                    | 954 444 (97)                      | 972 093 (99)                             | 954 942 (97)                               |
| Other                                            | 9 474 (1)                       | 28 193 (3)                        | 10 083 (1)                               | 27 584 (3)                                 |
| Civil status [n (%)]                             |                                 |                                   |                                          |                                            |
| Married/Cohabiting                               | 750 373 (76)                    | 687 827 (70)                      | 761 163 (78)                             | 677 037 (69)                               |
| Other                                            | 231 692 (23)                    | 294 810 (31)                      | 221 013 (23)                             | 305 489 (31)                               |
| Education <sup>a</sup> [n (%)]                   |                                 |                                   |                                          |                                            |
| Mandatory                                        | 334 650 (34)                    | 376 929 (38)                      | 375 300 (38)                             | 336 279 (34)                               |
| Short                                            | 462 416 (47)                    | 425 597 (43)                      | 446 979 (45)                             | 441 034 (45)                               |
| Medium or long                                   | 184 999 (19)                    | 180 111 (18)                      | 159 897 (17)                             | 205 213 (21)                               |
| Occupational status <sup>b</sup> [n (%)]         |                                 |                                   |                                          |                                            |
| White collar, high level                         | 116 301 (12)                    | 84 583 (9)                        | 96 701 (10)                              | 104 183 (11)                               |
| White collar, low level                          | 176 091 (18)                    | 120 537 (12)                      | 159 592 (16)                             | 137 036 (14)                               |
| Blue collar                                      | 350 990 (36)                    | 239 223 (24)                      | 337 155 (34)                             | 253 058 (26)                               |
| Unemployed                                       | 41 608 (4)                      | 34 349 (4)                        | 37 510 (4)                               | 38 447 (4)                                 |
| Retired                                          | 297 075 (30)                    | 503 945 (51)                      | 351 218 (36)                             | 449 802 (46)                               |
| Personal income, quintiles <sup>c</sup> [n (%)]  |                                 |                                   |                                          |                                            |
| 1st (low)                                        | 211 273 (22)                    | 278 390 (28)                      | 246 478 (25)                             | 243 185 (25)                               |
| 2nd                                              | 195 324 (20)                    | 219 380 (22)                      | 208 357 (21)                             | 206 347 (21)                               |
| 3rd                                              | 179 584 (18)                    | 147 436 (15)                      | 176 025 (18)                             | 150 995 (15)                               |
| 4th                                              | 190 453 (19)                    | 146 755 (15)                      | 177 045 (18)                             | 160 163 (16)                               |
| 5th (high)                                       | 205 431 (21)                    | 190 676 (19)                      | 174 271 (18)                             | 221 836 (23)                               |
| Household income, quintiles <sup>d</sup> [n (%)] |                                 |                                   |                                          |                                            |
| 1st (low)                                        | 176 673 (18)                    | 230 243 (24)                      | 201 285 (21)                             | 205 631 (21)                               |
| 2nd                                              | 171 789 (18)                    | 183 784 (19)                      | 180 510 (18)                             | 175 063 (18)                               |
| 3rd                                              | 181 036 (18)                    | 147 863 (15)                      | 177 663 (18)                             | 151 236 (15)                               |
| 4th                                              | 219 338 (22)                    | 172 432 (18)                      | 209 968 (22)                             | 181 802 (18)                               |
| 5th (high)                                       | 233 229 (24)                    | 248 315 (25)                      | 212 750 (22)                             | 268 794 (27)                               |
| <i>Area-level variables [median (10-90%)]</i>    |                                 |                                   |                                          |                                            |
| % Non-western background                         | 3 (1-10)                        | 4 (1-14)                          | 2 (1-7)                                  | 5 (1-15)                                   |
| % Only basic education                           | 11 (6-15)                       | 11 (6-15)                         | 11 (7-15)                                | 10 (5-14)                                  |
| % Manual labour                                  | 14 (9-17)                       | 13 (8-17)                         | 14 (11-17)                               | 12 (7-16)                                  |
| % Unemployed                                     | 2 (1-3)                         | 2 (1-3)                           | 2 (1-3)                                  | 2 (1-3)                                    |
| % Low income                                     | 4 (2-7)                         | 4 (2-8)                           | 4 (2-7)                                  | 4 (2-9)                                    |
| % Social housing <sup>e</sup>                    | 11 (0-35)                       | 17 (2-48)                         | 9 (0-28)                                 | 20 (3-49)                                  |
| % Sole-providers                                 | 5 (3-8)                         | 6 (4-8)                           | 5 (3-7)                                  | 6 (4-9)                                    |

| % With criminal record | 0.4 (0.1-0.8) | 0.5 (0.2-1.0) | 0.4 (0.1-0.7) | 0.5 (0.2-1.0) |
|------------------------|---------------|---------------|---------------|---------------|
|------------------------|---------------|---------------|---------------|---------------|

<sup>a</sup>: Short: vocational training, secondary education or <2 years of post-secondary education. Medium or long >2 years of post secondary education

<sup>b</sup>: White collar, high level: Managers/directors with ≥5 employees and people with employment that requires high level skills. White collar, low level: Managers with 0-4 employees and people with employment that requires intermediate level skills. Blue collar: employment that requires low level skills.

<sup>c</sup>: we applied age and calendar year specific quintiles to account for inflation and income disparities by sex. In 2017 the 20<sup>th</sup> 40<sup>th</sup> 60<sup>th</sup> and 80<sup>th</sup> percentile in dkr were 142 926, 198 363, 249 053, and 312 717 for women and 147 235, 219 142, 281 097, and 370 134 for men.

<sup>d</sup>: we applied age and calendar year specific quintiles to account for inflation and income disparities by sex for singles. In 2017, the 20<sup>th</sup> 40<sup>th</sup> 60<sup>th</sup> and 80<sup>th</sup> percentile per adult in household, in dkr, were 174 497, 229 476, 286 079, and 365 263 for women and 171 817, 232 821, 290 162, and 369 949 for men.

<sup>e</sup>: Publicly funded non-profit housing estates, where a third of the apartments can be used by municipalities for persons in need.

**Table S3.** Spearman rank correlations between 5-year time weighted average air pollution concentration at residences of all cohort members, Denmark, 2005-2017, N=1,964,702.

|                         | <b>PM<sub>2.5</sub></b> |         |             |          |              | <b>UFP</b> |         |             | <b>EC</b> |         |             | <b>NO<sub>2</sub></b> |         |             |
|-------------------------|-------------------------|---------|-------------|----------|--------------|------------|---------|-------------|-----------|---------|-------------|-----------------------|---------|-------------|
|                         | Total                   | Traffic | Non-traffic | Tailpipe | Non-tailpipe | Total      | Traffic | Non-traffic | Total     | Traffic | Non-traffic | Total                 | Traffic | Non-traffic |
| <b>PM<sub>2.5</sub></b> |                         |         |             |          |              |            |         |             |           |         |             |                       |         |             |
| Total                   | 1                       | 0.59    | 0.96        | 0.66     | 0.45         | 0.77       | 0.63    | 0.77        | 0.71      | 0.62    | 0.69        | 0.76                  | 0.60    | 0.80        |
| Traffic                 | 0.59                    | 1       | 0.41        | 0.99     | 0.97         | 0.80       | 0.97    | 0.63        | 0.91      | 0.99    | 0.68        | 0.91                  | 0.99    | 0.56        |
| Non-traffic             | 0.96                    | 0.41    | 1           | 0.49     | 0.26         | 0.67       | 0.46    | 0.72        | 0.56      | 0.44    | 0.63        | 0.61                  | 0.42    | 0.77        |
| Tailpipe                | 0.66                    | 0.99    | 0.49        | 1        | 0.94         | 0.83       | 0.98    | 0.68        | 0.92      | 0.99    | 0.71        | 0.93                  | 0.99    | 0.61        |
| Non-tailpipe            | 0.45                    | 0.97    | 0.26        | 0.94     | 1            | 0.71       | 0.93    | 0.53        | 0.85      | 0.96    | 0.60        | 0.84                  | 0.96    | 0.46        |
| <b>UFP</b>              |                         |         |             |          |              |            |         |             |           |         |             |                       |         |             |
| Total                   | 0.77                    | 0.80    | 0.67        | 0.83     | 0.71         | 1          | 0.85    | 0.96        | 0.91      | 0.83    | 0.86        | 0.92                  | 0.81    | 0.82        |
| Traffic                 | 0.63                    | 0.97    | 0.46        | 0.98     | 0.93         | 0.85       | 1       | 0.69        | 0.94      | 0.99    | 0.75        | 0.93                  | 0.99    | 0.61        |
| Non-traffic             | 0.77                    | 0.63    | 0.72        | 0.68     | 0.53         | 0.96       | 0.69    | 1           | 0.80      | 0.67    | 0.85        | 0.80                  | 0.64    | 0.84        |
| <b>EC</b>               |                         |         |             |          |              |            |         |             |           |         |             |                       |         |             |
| Total                   | 0.71                    | 0.91    | 0.56        | 0.92     | 0.85         | 0.91       | 0.94    | 0.80        | 1         | 0.93    | 0.90        | 0.93                  | 0.92    | 0.69        |
| Traffic                 | 0.62                    | 0.99    | 0.44        | 0.99     | 0.96         | 0.83       | 0.99    | 0.67        | 0.93      | 1       | 0.72        | 0.92                  | 0.99    | 0.59        |
| Non-traffic             | 0.69                    | 0.68    | 0.63        | 0.71     | 0.60         | 0.86       | 0.75    | 0.85        | 0.90      | 0.72    | 1           | 0.78                  | 0.71    | 0.71        |
| <b>NO<sub>2</sub></b>   |                         |         |             |          |              |            |         |             |           |         |             |                       |         |             |
| Total                   | 0.76                    | 0.91    | 0.61        | 0.93     | 0.84         | 0.92       | 0.93    | 0.80        | 0.93      | 0.92    | 0.78        | 1                     | 0.92    | 0.82        |
| Traffic                 | 0.60                    | 0.99    | 0.42        | 0.99     | 0.96         | 0.81       | 0.99    | 0.64        | 0.92      | 0.99    | 0.71        | 0.92                  | 1       | 0.56        |
| Non-traffic             | 0.80                    | 0.56    | 0.77        | 0.61     | 0.46         | 0.82       | 0.61    | 0.84        | 0.69      | 0.59    | 0.71        | 0.82                  | 0.56    | 1           |

**Table S4.** Spearman rank correlations between area level socioeconomic factors and individual socioeconomic factors and air pollutant concentrations. Air pollution is 5-year time weighted average air pollution concentration at residences of each cohort member. Denmark, 2005-2017, N=1,964,702.

|                               | Area-level covariates (% of parish inhabitants) |                 |            |              |                        |                |               |            |
|-------------------------------|-------------------------------------------------|-----------------|------------|--------------|------------------------|----------------|---------------|------------|
|                               | Basic education                                 | Criminal record | Low income | Manual labor | Non western background | Social housing | Sole provider | Unemployed |
| <b>Personal covariates</b>    |                                                 |                 |            |              |                        |                |               |            |
| Education                     | -0.22                                           | -0.04           | -0.08      | -0.17        | 0.06                   | 0.01           | 0.05          | -0.10      |
| Occupational status           | -0.05                                           | -0.06           | -0.07      | 0.01         | -0.04                  | -0.07          | -0.03         | 0.04       |
| Income                        | -0.17                                           | -0.06           | -0.12      | -0.11        | 0.05                   | 0.00           | 0.04          | -0.10      |
| Household income              | -0.18                                           | -0.11           | -0.19      | -0.07        | 0.00                   | -0.04          | 0.02          | -0.14      |
| <b>Pollutants</b>             |                                                 |                 |            |              |                        |                |               |            |
| PM <sub>2.5</sub> Total       | 0.10                                            | 0.16            | 0.00       | -0.16        | 0.19                   | 0.17           | 0.03          | 0.27       |
| PM <sub>2.5</sub> Traffic     | -0.29                                           | 0.29            | 0.05       | -0.46        | 0.50                   | 0.36           | 0.23          | 0.15       |
| PM <sub>2.5</sub> non-traffic | 0.18                                            | 0.10            | -0.04      | -0.06        | 0.09                   | 0.12           | 0.00          | 0.26       |
| UFP total                     | -0.19                                           | 0.26            | 0.04       | -0.42        | 0.43                   | 0.35           | 0.22          | 0.23       |
| UFP traffic                   | -0.30                                           | 0.29            | 0.03       | -0.48        | 0.53                   | 0.39           | 0.25          | 0.16       |
| UFP non-traffic               | -0.12                                           | 0.20            | -0.01      | -0.34        | 0.33                   | 0.30           | 0.19          | 0.23       |
| EC total                      | -0.27                                           | 0.26            | 0.01       | -0.44        | 0.47                   | 0.35           | 0.23          | 0.17       |
| EC traffic                    | -0.29                                           | 0.29            | 0.04       | -0.47        | 0.52                   | 0.37           | 0.24          | 0.16       |
| EC non-traffic                | -0.23                                           | 0.16            | -0.08      | -0.34        | 0.35                   | 0.29           | 0.20          | 0.14       |
| NO <sub>2</sub> total         | -0.22                                           | 0.28            | 0.06       | -0.44        | 0.49                   | 0.35           | 0.23          | 0.18       |
| NO <sub>2</sub> traffic       | -0.29                                           | 0.28            | 0.04       | -0.46        | 0.51                   | 0.36           | 0.23          | 0.15       |
| NO <sub>2</sub> non-traffic   | -0.07                                           | 0.17            | 0.00       | -0.27        | 0.31                   | 0.23           | 0.17          | 0.16       |



**Table S5.** Spearman rank correlations between 1, 5 and 10-year average air pollution concentration at residential addresses of all cohort members. Denmark, 2005-2017, N=1,964,702.

|                                | Time weighted average periods |              |              |
|--------------------------------|-------------------------------|--------------|--------------|
|                                | 1 vs 5 year                   | 5 vs 10 year | 1 vs 10 year |
| PM <sub>2.5</sub> total        | 0.97                          | 0.99         | 0.95         |
| PM <sub>2.5</sub> traffic      | 0.97                          | 0.97         | 0.93         |
| PM <sub>2.5</sub> non-traffic  | 0.97                          | 1.00         | 0.95         |
| PM <sub>2.5</sub> tailpipe     | 0.97                          | 0.97         | 0.93         |
| PM <sub>2.5</sub> Non-Tailpipe | 0.97                          | 0.98         | 0.94         |
| EC <sub>total</sub>            | 0.94                          | 0.98         | 0.89         |
| EC <sub>traffic</sub>          | 0.97                          | 0.97         | 0.93         |
| EC <sub>non-traffic</sub>      | 0.92                          | 0.97         | 0.85         |
| UFP <sub>total</sub>           | 0.96                          | 0.97         | 0.91         |
| UFP <sub>traffic</sub>         | 0.98                          | 0.98         | 0.94         |
| UFP <sub>non-traffic</sub>     | 0.96                          | 0.96         | 0.90         |
| NO <sub>2</sub> total          | 0.98                          | 0.98         | 0.95         |
| NO <sub>2</sub> traffic        | 0.98                          | 0.98         | 0.94         |
| NO <sub>2</sub> non-traffic    | 0.98                          | 0.99         | 0.96         |

**Table S6.** Linear associations between MI and air pollutants, total and by source, per fixed unit. Fully adjusted model 3. Denmark, 2005-2017, N=1,964,702.

| Pollutant/source        | Unit                     | HR <sup>a</sup> | (95% CI)      |
|-------------------------|--------------------------|-----------------|---------------|
| <b>PM<sub>2.5</sub></b> |                          |                 |               |
| Total                   | 5 µg/m <sup>3</sup>      | 1.149           | (1.097-1.203) |
| Non-traffic             | 5 µg/m <sup>3</sup>      | 1.164           | (1.102-1.228) |
| Traffic                 | 5 µg/m <sup>3</sup>      | 1.158           | (1.047-1.282) |
| Tailpipe                | 5 µg/m <sup>3</sup>      | 1.294           | (1.091-1.534) |
| Non-tailpipe            | 5 µg/m <sup>3</sup>      | 1.359           | (1.073-1.722) |
| <b>UFP</b>              |                          |                 |               |
| Total                   | 10.000 #/cm <sup>3</sup> | 1.096           | (1.059-1.133) |
| Non-traffic             | 10.000 #/cm <sup>3</sup> | 1.129           | (1.083-1.177) |
| Traffic                 | 10.000 #/cm <sup>3</sup> | 1.068           | (0.992-1.151) |
| <b>EC</b>               |                          |                 |               |
| Total                   | 1 µg/m <sup>3</sup>      | 1.034           | (1.000-1.068) |
| Non-traffic             | 1 µg/m <sup>3</sup>      | 1.011           | (0.963-1.061) |
| Traffic                 | 1 µg/m <sup>3</sup>      | 1.08            | (1.020-1.145) |
| <b>NO<sub>2</sub></b>   |                          |                 |               |
| Total                   | 10 µg/m <sup>3</sup>     | 1.037           | (1.019-1.056) |
| Non-traffic             | 10 µg/m <sup>3</sup>     | 1.191           | (1.135-1.249) |
| Traffic                 | 10 µg/m <sup>3</sup>     | 1.017           | (0.995-1.039) |

<sup>a</sup>: adjusted for age, sex and calendar period, marital status, education, occupational status, ethnicity, personal and household income and area level information on percentage of population: living in social housing, being sole providers, of non-western origin, having low income, being unemployed, having blue collar work, having only basic education and having criminal record.

**Table S7.** Associations between MI and categories of air pollutants concentration: overall and by traffic or non-traffic sources. Denmark, 2005-2017, N=1,964,702.

| Percentile                               |                | Total           |               | Traffic        |                 | Non-traffic   |                |                 |               |
|------------------------------------------|----------------|-----------------|---------------|----------------|-----------------|---------------|----------------|-----------------|---------------|
| PM <sub>2.5</sub> (µg/m <sup>3</sup> )   | Exposure range | HR <sup>a</sup> | (95%CI)       | Exposure range | HR <sup>a</sup> | (95%CI)       | Exposure range | HR <sup>a</sup> | (95%CI)       |
| <10                                      | <8.69          | Ref.            | -             | <0.06          | Ref.            | -             | <8.51          | Ref.            | -             |
| 10-25                                    | 8.69-<9.4      | 1.035           | (1.007-1.063) | 0.06-<0.1      | 0.983           | (0.957-1.011) | 8.51-<9.16     | 1.025           | (0.997-1.054) |
| 25-50                                    | 9.4-<10.28     | 1.049           | (1.020-1.078) | 0.1-<0.23      | 0.977           | (0.950-1.004) | 9.16-<9.98     | 1.059           | (1.030-1.088) |
| 50-75                                    | 10.28-<11.26   | 1.098           | (1.063-1.134) | 0.23-<0.47     | 0.982           | (0.953-1.012) | 9.98-<10.79    | 1.109           | (1.072-1.146) |
| 75-90                                    | 11.26-<11.91   | 1.092           | (1.050-1.135) | 0.47-<0.86     | 1.026           | (0.990-1.062) | 10.79-<11.34   | 1.104           | (1.061-1.149) |
| 90-95                                    | 11.91-<12.26   | 1.104           | (1.049-1.162) | 0.86-<1.27     | 1.011           | (0.963-1.062) | 11.34-<11.55   | 1.115           | (1.058-1.175) |
| 95-100                                   | 12.26+         | 1.118           | (1.060-1.180) | 1.27+          | 1.033           | (0.984-1.086) | 11.55+         | 1.078           | (1.026-1.133) |
| <b>UFP (particles/m<sup>3</sup>)</b>     |                |                 |               |                |                 |               |                |                 |               |
| <10                                      | <7533          | Ref.            | -             | <324           | Ref.            | -             | <7046          | Ref.            | -             |
| 10-25                                    | 7533-<8877     | 1.011           | (0.983-1.040) | 324-<567       | 0.987           | (0.961-1.014) | 7046-<8147     | 0.978           | (0.951-1.006) |
| 25-50                                    | 8877-<10696    | 1.005           | (0.976-1.033) | 567-<1159      | 0.985           | (0.958-1.012) | 8147-<9302     | 1.010           | (0.981-1.040) |
| 50-75                                    | 10696-<13125   | 1.039           | (1.006-1.073) | 1159-<2264     | 0.972           | (0.942-1.002) | 9302-<10916    | 1.025           | (0.992-1.059) |
| 75-90                                    | 13125-<15290   | 1.069           | (1.028-1.111) | 2264-<3490     | 1.011           | (0.974-1.050) | 10916-<11878   | 1.011           | (0.972-1.052) |
| 90-95                                    | 15290-<16652   | 1.058           | (1.005-1.114) | 3490-<4363     | 1.009           | (0.958-1.063) | 11878-<12832   | 1.064           | (1.015-1.115) |
| 95-100                                   | 16652+         | 1.098           | (1.044-1.156) | 4363+          | 1.028           | (0.975-1.085) | 12832+         | 1.089           | (1.040-1.140) |
| <b>EC (µg/m<sup>3</sup>)</b>             |                |                 |               |                |                 |               |                |                 |               |
| <10                                      | <0.44          | Ref.            | -             | <0.03          | Ref.            | -             | <0.39          | Ref.            | -             |
| 10-25                                    | 0.44-<0.52     | 0.997           | (0.970-1.025) | 0.03-<0.05     | 0.987           | (0.960-1.014) | 0.39-<0.46     | 0.985           | (0.959-1.013) |
| 25-50                                    | 0.52-<0.64     | 0.988           | (0.962-1.016) | 0.05-<0.11     | 0.979           | (0.952-1.007) | 0.46-<0.52     | 0.979           | (0.952-1.007) |
| 50-75                                    | 0.64-<0.8      | 0.988           | (0.958-1.020) | 0.11-<0.22     | 0.981           | (0.951-1.012) | 0.52-<0.58     | 0.989           | (0.959-1.021) |
| 75-90                                    | 0.8-<0.96      | 1.027           | (0.989-1.065) | 0.22-<0.36     | 1.02            | (0.983-1.059) | 0.58-<0.62     | 0.971           | (0.937-1.007) |
| 90-95                                    | 0.96-<1.09     | 1.035           | (0.985-1.087) | 0.36-<0.49     | 1.04            | (0.989-1.094) | 0.62-<0.65     | 0.97            | (0.927-1.016) |
| 95-100                                   | 1.09+          | 1.038           | (0.988-1.092) | 0.49+          | 1.028           | (0.975-1.083) | 0.65+          | 0.983           | (0.942-1.027) |
| <b>NO<sub>2</sub> (µg/m<sup>3</sup>)</b> |                |                 |               |                |                 |               |                |                 |               |
| <10                                      | <9.88          | Ref.            | -             | <1.25          | Ref.            | -             | <8.01          | Ref.            | -             |
| 10-25                                    | 9.88-<11.82    | 1.004           | (0.977-1.032) | 1.25-<2.09     | 0.983           | (0.957-1.010) | 8.01-<9.22     | 1.007           | (0.979-1.035) |
| 25-50                                    | 11.82-<14.73   | 1.013           | (0.986-1.041) | 2.09-<3.96     | 0.972           | (0.946-0.999) | 9.22-<10.54    | 1.035           | (1.007-1.063) |
| 50-75                                    | 14.73-<18.97   | 1.034           | (1.003-1.066) | 3.96-<7.27     | 0.976           | (0.948-1.006) | 10.54-<11.9    | 1.075           | (1.044-1.107) |
| 75-90                                    | 18.97-<23.37   | 1.081           | (1.042-1.121) | 7.27-<11.25    | 1.011           | (0.976-1.048) | 11.9-<13.03    | 1.097           | (1.058-1.136) |
| 90-95                                    | 23.37-<26.81   | 1.069           | (1.017-1.124) | 11.25-<14.53   | 0.994           | (0.946-1.045) | 13.03-<13.61   | 1.08            | (1.026-1.138) |
| 95-100                                   | 26.81+         | 1.059           | (1.006-1.115) | 14.53+         | 1.009           | (0.961-1.061) | 13.61+         | 1.128           | (1.077-1.181) |

<sup>a</sup>: Adjusted for age, sex, calendar period, marital status, education, occupational status, ethnicity, personal and household income and percentage of parish population: living in social housing, being sole providers, of non-western origin, having low income, being unemployed, having blue collar work, having only basic education and having a criminal record.

**Table S8.** Associations between MI and categories of PM<sub>2.5</sub> from traffic, traffic-tailpipe and traffic-non-tailpipe. Denmark, 2005-2017, N=1,964,702.

| Percentile | Traffic                             |                         | Tailpipe                            |                         | Non-tailpipe                        |                         |
|------------|-------------------------------------|-------------------------|-------------------------------------|-------------------------|-------------------------------------|-------------------------|
|            | Exposure range (µg/m <sup>3</sup> ) | HR <sup>a</sup> (95%CI) | Exposure range (µg/m <sup>3</sup> ) | HR <sup>a</sup> (95%CI) | Exposure range (µg/m <sup>3</sup> ) | HR <sup>a</sup> (95%CI) |
| <10        | <0.06                               | Ref. -                  | <0.04                               | Ref. -                  | <0.02                               | Ref. -                  |
| 10-25      | 0.06-<0.1                           | 0.983 (0.957-1.011)     | 0.04-<0.07                          | 0.984 (0.957-1.010)     | 0.02-<0.03                          | 0.99 (0.962-1.019)      |
| 25-50      | 0.1-<0.23                           | 0.977 (0.950-1.004)     | 0.07-<0.15                          | 0.978 (0.951-1.006)     | 0.03-<0.07                          | 0.995 (0.966-1.024)     |
| 50-75      | 0.23-<0.47                          | 0.982 (0.953-1.012)     | 0.15-<0.31                          | 0.988 (0.959-1.019)     | 0.07-<0.16                          | 0.977 (0.946-1.008)     |
| 75-90      | 0.47-<0.86                          | 1.026 (0.990-1.062)     | 0.31-<0.54                          | 1.030 (0.993-1.069)     | 0.16-<0.31                          | 1.026 (0.991-1.063)     |
| 90-95      | 0.86-<1.27                          | 1.011 (0.963-1.062)     | 0.54-<0.78                          | 1.009 (0.959-1.062)     | 0.31-<0.5                           | 1.053 (1.005-1.104)     |
| 95-100     | 1.27+                               | 1.033 (0.984-1.086)     | 0.78+                               | 1.056 (1.002-1.112)     | 0.5+                                | 1.043 (0.995-1.094)     |

<sup>a</sup>: Adjusted for age, sex, calendar period, marital status, education, occupational status, ethnicity, personal and household income and percentage of parish population: living in social housing, being sole providers, of non-western origin, having low income, being unemployed, having blue collar work, having only basic education and having a criminal record.

**Table S9** Akaike Information Criterion (AIC) analyses, comparing model fit of fully adjusted models (model 3) including five year average air pollutants either linearly or categorically. Model adjusted for age, sex, calendar period, marital status, education, occupational status, ethnicity, personal and household income and percentage of parish population: living in social housing, being sole providers, of non-western origin, having low income, being unemployed, having blue collar work, having only basic education and having a criminal record.

|                         | Linear model |              |             | Categorical model |              |             |
|-------------------------|--------------|--------------|-------------|-------------------|--------------|-------------|
|                         | AIC          | $\Delta$ AIC | $W_{AIC}^a$ | AIC               | $\Delta$ AIC | $W_{AIC}^a$ |
| <b>PM<sub>2.5</sub></b> |              |              |             |                   |              |             |
| Total                   | 1,818,424.21 | 0.00         | 0.99        | 1,818,433.89      | 9.68         | 0.01        |
| Non-traffic             | 1,818,429.22 | 3.51         | 0.15        | 1,818,425.72      | 0.00         | 0.85        |
| Traffic                 | 1,818,451.32 | 1.54         | 0.32        | 1,818,449.78      | 0.00         | 0.68        |
| Tail-pipe               | 1,818,450.64 | 3.71         | 0.14        | 1,818,446.94      | 0.00         | 0.86        |
| Non-tailpipe            | 1,818,452.94 | 10.06        | 0.01        | 1,818,442.87      | 0.00         | 0.99        |
| <b>UFP</b>              |              |              |             |                   |              |             |
| Total                   | 1,818,432.09 | 0.00         | 0.99        | 1,818,442.41      | 10.32        | 0.01        |
| Non-traffic             | 1,818,428.40 | 0.00         | 0.98        | 1,818,435.97      | 7.56         | 0.02        |
| Traffic                 | 1,818,456.28 | 0.94         | 0.38        | 1,818,455.35      | 0.00         | 0.62        |
| <b>EC</b>               |              |              |             |                   |              |             |
| Total                   | 1,818,455.77 | 1.14         | 0.36        | 1,818,454.63      | 0.00         | 0.64        |
| Non-traffic             | 1,818,459.13 | 0.00         | 0.95        | 1,818,465.00      | 5.87         | 0.05        |
| Traffic                 | 1,818,452.55 | 1.44         | 0.33        | 1,818,451.11      | 0.00         | 0.67        |
| <b>NO<sub>2</sub></b>   |              |              |             |                   |              |             |
| Total                   | 1,818,443.61 | 0.00         | 0.52        | 1,818,443.80      | 0.19         | 0.48        |
| Non-traffic             | 1,818,409.30 | 0.00         | 0.95        | 1,818,415.10      | 5.80         | 0.05        |
| Traffic                 | 1,818,456.99 | 2.23         | 0.35        | 1,818,455.76      | 0.00         | 0.65        |

<sup>a</sup> $W_{AIC}$ : AIC weight – probability that this model is the better of the two models

**Table S10.** Associations between air pollutants and MI; exposure calculated as running averages over the past 1, 5 and 10 years, expressed per IQR and per fixed unit increments. Denmark, 2005-2017, N=1,964,702.

| TWA- period                   | IQR                    | HR <sup>a</sup> per IQR | 95%CI         | Unit                   | HR <sup>a</sup> per unit | 95% CI        |
|-------------------------------|------------------------|-------------------------|---------------|------------------------|--------------------------|---------------|
| <b>PM<sub>2.5</sub>-total</b> |                        |                         |               |                        |                          |               |
| 1 yr                          | 1.85 µg/m <sup>3</sup> | 1.049                   | (1.032-1.066) | 5 µg/m <sup>3</sup>    | 1.137                    | (1.088-1.188) |
| 5 yr                          | 1.85 µg/m <sup>3</sup> | 1.053                   | (1.035-1.071) | 5 µg/m <sup>3</sup>    | 1.149                    | (1.097-1.203) |
| 10 yr                         | 1.85 µg/m <sup>3</sup> | 1.049                   | (1.032-1.065) | 5 µg/m <sup>3</sup>    | 1.137                    | (1.089-1.186) |
| <b>UFP<sub>total</sub></b>    |                        |                         |               |                        |                          |               |
| 1 yr                          | 4248 #/cm <sup>3</sup> | 1.035                   | (1.020-1.051) | 10000#/cm <sup>3</sup> | 1.086                    | (1.047-1.125) |
| 5 yr                          | 4248 #/cm <sup>3</sup> | 1.040                   | (1.025-1.055) | 10000#/cm <sup>3</sup> | 1.096                    | (1.059-1.133) |
| 10 yr                         | 4248 #/cm <sup>3</sup> | 1.035                   | (1.022-1.049) | 10000#/cm <sup>3</sup> | 1.085                    | (1.051-1.120) |
| <b>EC<sub>total</sub></b>     |                        |                         |               |                        |                          |               |
| 1 yr                          | 0.28 µg/m <sup>3</sup> | 1.009                   | (0.998-1.019) | 1 µg/m <sup>3</sup>    | 1.031                    | (0.994-1.069) |
| 5 yr                          | 0.28 µg/m <sup>3</sup> | 1.009                   | (1.000-1.019) | 1 µg/m <sup>3</sup>    | 1.034                    | (1.000-1.068) |
| 10 yr                         | 0.28 µg/m <sup>3</sup> | 1.009                   | (1.001-1.017) | 1 µg/m <sup>3</sup>    | 1.032                    | (1.003-1.062) |
| <b>NO<sub>2</sub>-total</b>   |                        |                         |               |                        |                          |               |
| 1 yr                          | 7.15 µg/m <sup>3</sup> | 1.024                   | (1.010-1.038) | 10 µg/m <sup>3</sup>   | 1.034                    | (1.014-1.053) |
| 5 yr                          | 7.15 µg/m <sup>3</sup> | 1.027                   | (1.013-1.040) | 10 µg/m <sup>3</sup>   | 1.037                    | (1.019-1.056) |
| 10 yr                         | 7.15 µg/m <sup>3</sup> | 1.025                   | (1.013-1.038) | 10 µg/m <sup>3</sup>   | 1.036                    | (1.018-1.054) |

<sup>a</sup>: Adjusted for age, sex, calendar period, marital status, education, occupational status, ethnicity, personal and household income and percentage of parish population: living in social housing, being sole providers, of non-western origin, having low income, being unemployed, having blue collar work, having only basic education and having a criminal record.

**Table S11.** Sensitivity analysis of associations between MI (cases=71,285) and 5-year averages of air pollutants, total and by source. Denmark, 2005-2017, N=1,964,702. Person years: 18,309,319

|                         | IQR                    | Model3 <sup>a</sup> per IQR | Model3 <sup>a</sup> per IQR<br>With year of entry as strata | Model3 <sup>a</sup> per IQR<br>With calendar year as strata <sup>b</sup> | Model3 <sup>a</sup> per IQR<br>Year of entry=2005 <sup>c</sup> |
|-------------------------|------------------------|-----------------------------|-------------------------------------------------------------|--------------------------------------------------------------------------|----------------------------------------------------------------|
| <b>PM<sub>2.5</sub></b> |                        |                             |                                                             |                                                                          |                                                                |
|                         |                        | <b>HR 95%CI</b>             | <b>HR 95%CI</b>                                             |                                                                          |                                                                |
| Total                   | 1.85 µg/m <sup>3</sup> | 1.053 (1.035, 1.071)        | 1.053 (1.035, 1.071)                                        | 1.052 (1.035, 1.070)                                                     | 1,044 (1,026-1,062)                                            |
| Non-traffic             | 1.63 µg/m <sup>3</sup> | 1.051 (1.032, 1.069)        | 1.051 (1.032, 1.069)                                        | 1.051 (1.032, 1.069)                                                     | 1,043 (1,024-1,062)                                            |
| Traffic                 | 0.37 µg/m <sup>3</sup> | 1.011 (1.003, 1.018)        | 1.011 (1.003, 1.018)                                        | 1.011 (1.003, 1.018)                                                     | 1,008 (1,001-1,016)                                            |
| Tailpipe                | 0.24 µg/m <sup>3</sup> | 1.012 (1.004, 1.020)        | 1.012 (1.004, 1.020)                                        | 1.012 (1.004, 1.020)                                                     | 1,010 (1,002-1,018)                                            |
| Non-tailpipe            | 0.12 µg/m <sup>3</sup> | 1.008 (1.002, 1.014)        | 1.008 (1.002, 1.014)                                        | 1.008 (1.002, 1.014)                                                     | 1,005 (0,999-1,011)                                            |
| <b>UFP</b>              |                        |                             |                                                             |                                                                          |                                                                |
| Total                   | 4248 #/cm <sup>3</sup> | 1.040 (1.025, 1.055)        | 1.040 (1.025, 1.055)                                        | 1.039 (1.024, 1.054)                                                     | 1,036 (1,021-1,052)                                            |
| Non-traffic             | 2769#/cm <sup>3</sup>  | 1.034 (1.022, 1.046)        | 1.034 (1.022, 1.046)                                        | 1.034 (1.022, 1.046)                                                     | 1,033 (1,021-1,045)                                            |
| Traffic                 | 1698#/cm <sup>3</sup>  | 1.011 (0.999, 1.024)        | 1.011 (0.999, 1.024)                                        | 1.011 (0.999, 1.024)                                                     | 1,007 (0,994-1,020)                                            |
| <b>EC</b>               |                        |                             |                                                             |                                                                          |                                                                |
| Total                   | 0.28 µg/m <sup>3</sup> | 1.009 (1.000, 1.019)        | 1.009 (1.000, 1.019)                                        | 1.009 (1.000, 1.018)                                                     | 1,008 (0,998-1,017)                                            |
| Non-traffic             | 0.12 µg/m <sup>3</sup> | 1.001 (0.996, 1.007)        | 1.001 (0.996, 1.007)                                        | 1.001 (0.996, 1.007)                                                     | 1,001 (0,995-1,007)                                            |
| Traffic                 | 0.17 µg/m <sup>3</sup> | 1.013 (1.003, 1.023)        | 1.013 (1.003, 1.023)                                        | 1.013 (1.003, 1.023)                                                     | 1,010 (1,000-1,020)                                            |
| <b>NO<sub>2</sub></b>   |                        |                             |                                                             |                                                                          |                                                                |
| Total                   | 7.15 µg/m <sup>3</sup> | 1.027 (1.013, 1.040)        | 1.027 (1.013, 1.040)                                        | 1.026 (1.012, 1.039)                                                     | 1,020 (1,007-1,034)                                            |
| Non-traffic             | 2.68 µg/m <sup>3</sup> | 1.048 (1.034, 1.062)        | 1.048 (1.034, 1.062)                                        | 1.048 (1.034, 1.062)                                                     | 1,043 (1,029-1,057)                                            |
| Traffic                 | 5.17 µg/m <sup>3</sup> | 1.009 (0.998, 1.020)        | 1.009 (0.998, 1.020)                                        | 1.009 (0.998, 1.020)                                                     | 1,004 (0,993-1,016)                                            |

<sup>a</sup>: adjusted for age, sex and calendar year (in 2 year categories), marital status, education, occupational status, ethnicity and personal and household income, area level percentage of population: living in social housing, being sole providers, of non-western origin, having low income, being unemployed, having blue collar work, having only basic education and having a criminal record.

<sup>b</sup>: Running calendar year in 2-year categories included as strata instead of as covariate

<sup>c</sup>: Analysis restricted to people ≥ 50 year of age in 2005, i.e. with year of entry=2005

**Table S12.** Annual contributions from different SNAP source categories to Danish air pollution in 2010. Note that contributions from ships have been singled out from SNAP 08: Other mobile sources and machinery.<sup>2-4</sup>

| <b>Snap category</b>                                              | <b>PM<sub>2.5</sub><br/>10<sup>21</sup> Particles/year</b> | <b>UFP<br/>Kiloton/Year</b> |
|-------------------------------------------------------------------|------------------------------------------------------------|-----------------------------|
| 01: Combustion in energy and transformation industries            | 3,546                                                      | 1.54                        |
| 02: Non-industrial combustion plants                              | 63,904                                                     | 21.09                       |
| 03: Combustion in manufacturing industry                          | 12,986                                                     | 0.55                        |
| 04: Production processes                                          | 10,644                                                     | 2.91                        |
| 05: Extraction/distribution of fossil fuels and geothermal energy | 1,042                                                      | 0.21                        |
| 06: Solvents and other product use                                | 3,547                                                      | 1.12                        |
| 07: Road transport                                                | 33,162                                                     | 5.65                        |
| 08: Other mobile sources and machinery - except Ships             | 22,481                                                     | 3.37                        |
| 08: Ships                                                         | 98,294                                                     | 3.54                        |
| 09: Waste treatment and disposal                                  | 1,019                                                      | 1.35                        |
| 10: Agriculture                                                   | 1,726                                                      | 2.25                        |
| 11: Other sources and sinks                                       | 0                                                          | 0                           |



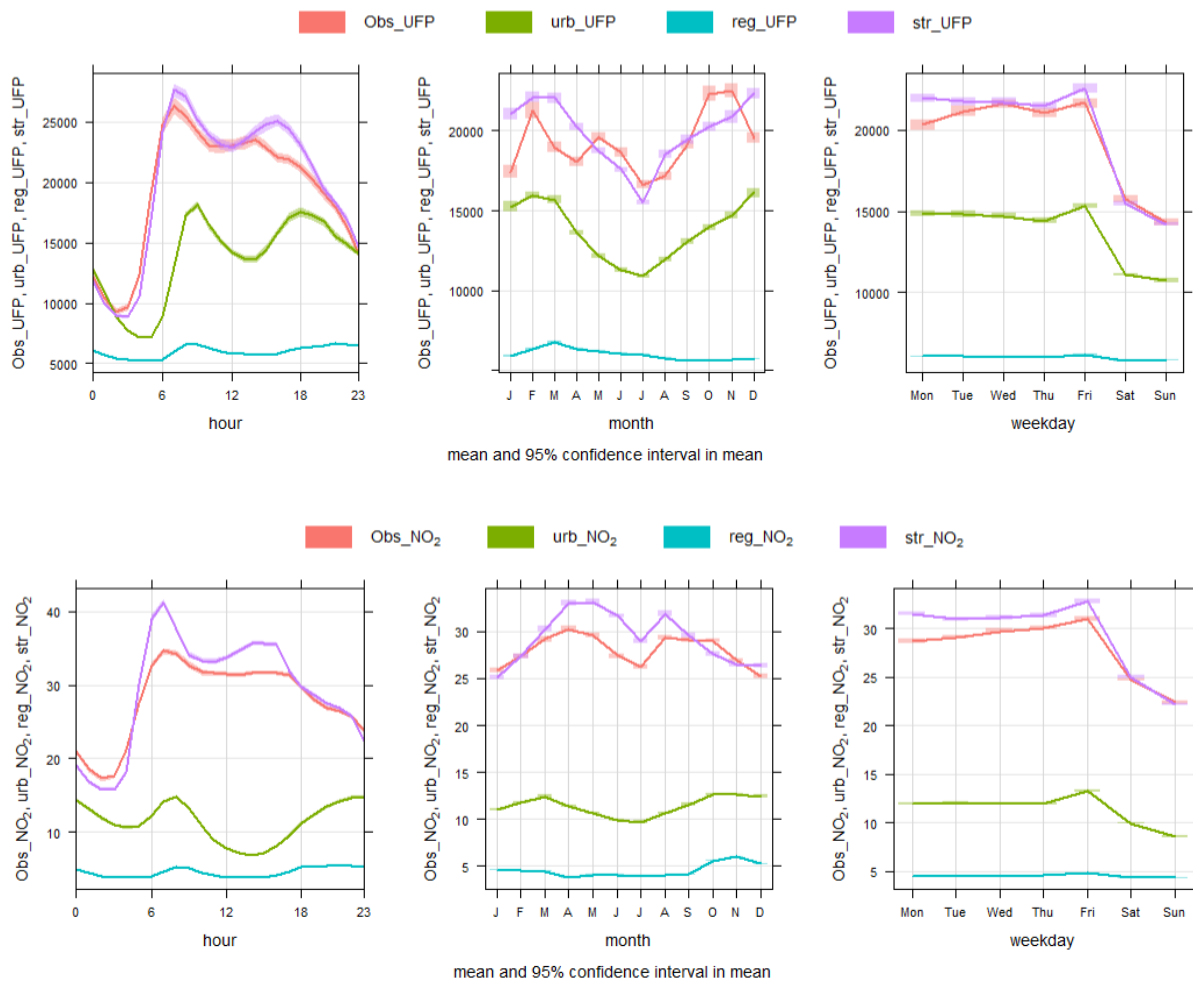

**Figure S1.** Modelled (purple) and measured (red) UFP and NO<sub>2</sub> concentrations as average time variation at three timescales (day, year, week) at the street station HCAB (Copenhagen, Denmark, dense traffic, 2002-2016).

Note:

Obs\_UFP, red= measured UFP (in #/cm<sup>3</sup>), str\_UFP, purple= Modelled UFP, reg\_UFP, blue= contribution to total (purple) from DEHM model. Urb\_UFP, green= contribution to total (purple) from UBM model.

Obs\_NO<sub>2</sub>, red= measured NO<sub>2</sub> (in ppb), str\_NO<sub>2</sub>, purple= Modelled NO<sub>2</sub>, reg\_NO<sub>2</sub>, blue= contribution to total (purple) from DEHM model. Urb\_NO<sub>2</sub>, green= contribution to total (purple) from UBM model.

European Monitoring and Evaluation Programme 2022, Geels 2021, Plejdrup 2021

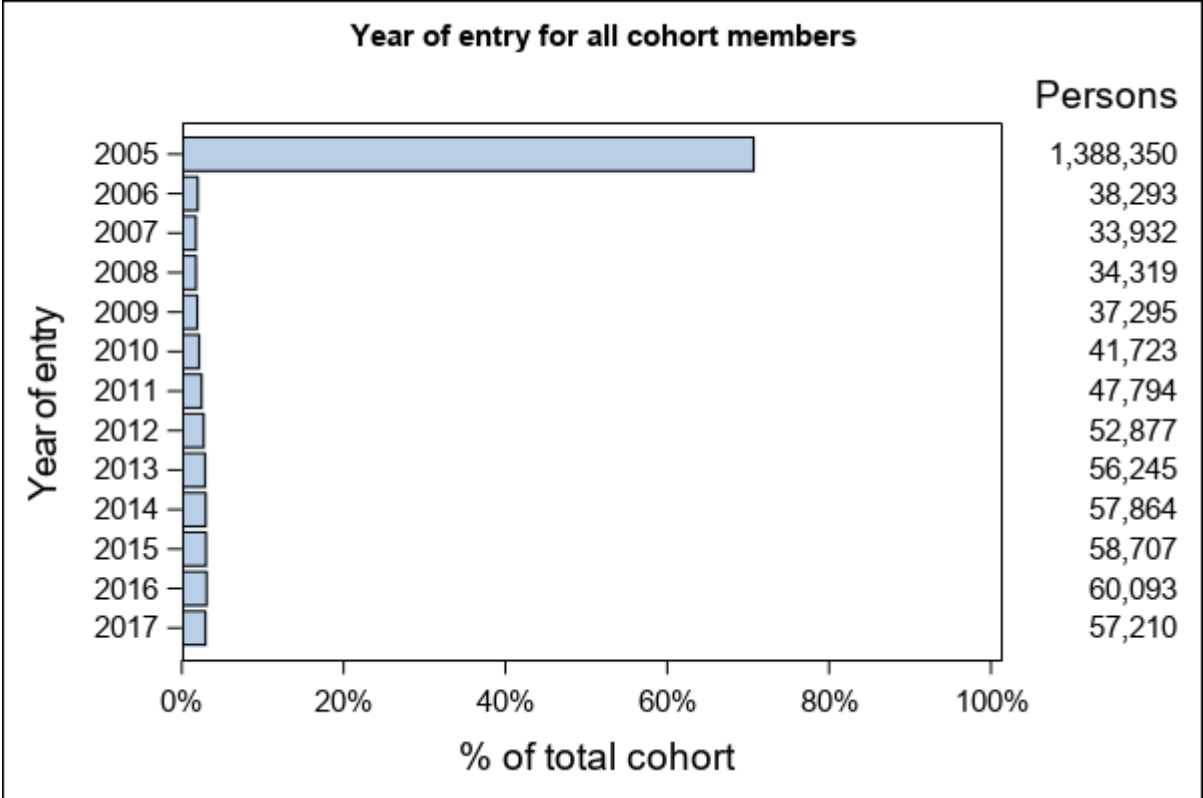

**Figure S2.** Year of entry for all cohort members. Year 2005 or age 50, whichever came first.

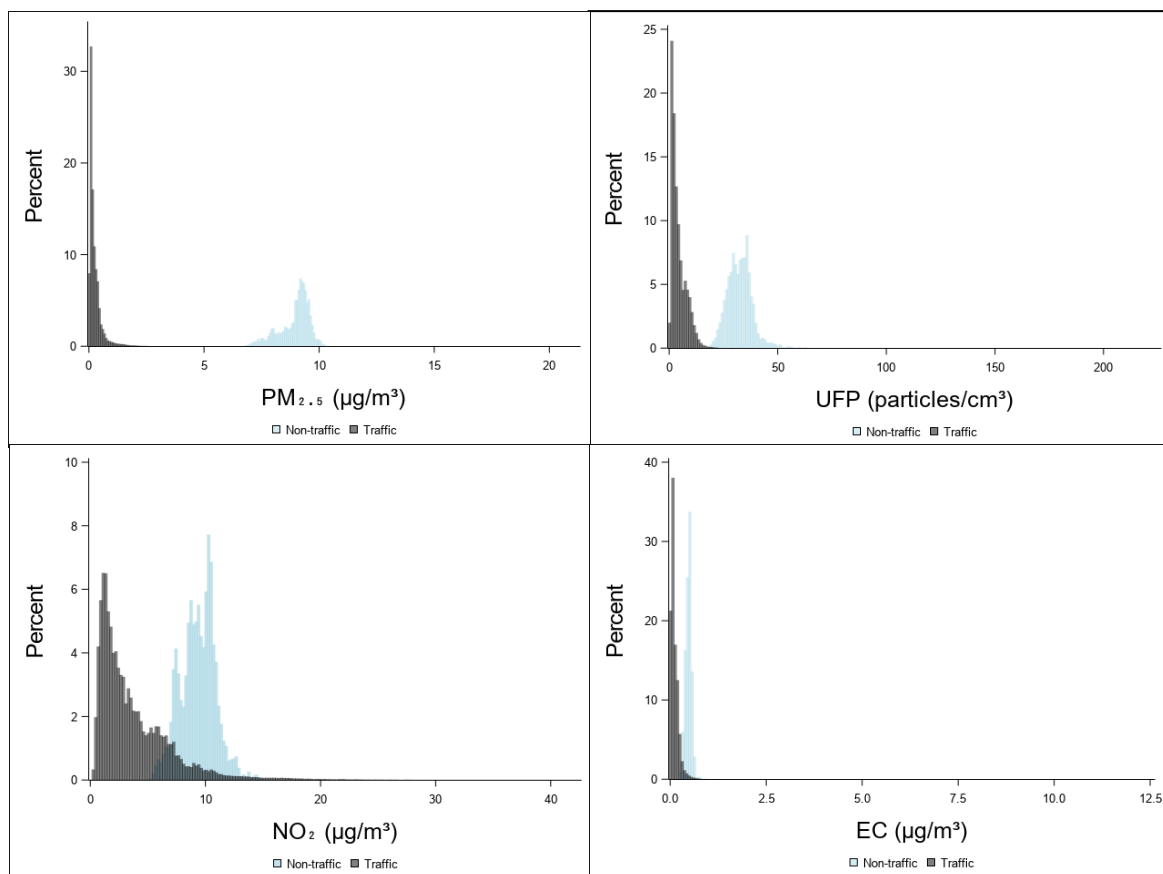

**Figure S3.** Distribution of PM<sub>2.5</sub>, UFP, BC and NO<sub>2</sub> concentrations as 5-year average over addresses held 2010 to 2014, by source: Danish road traffic versus other sources.

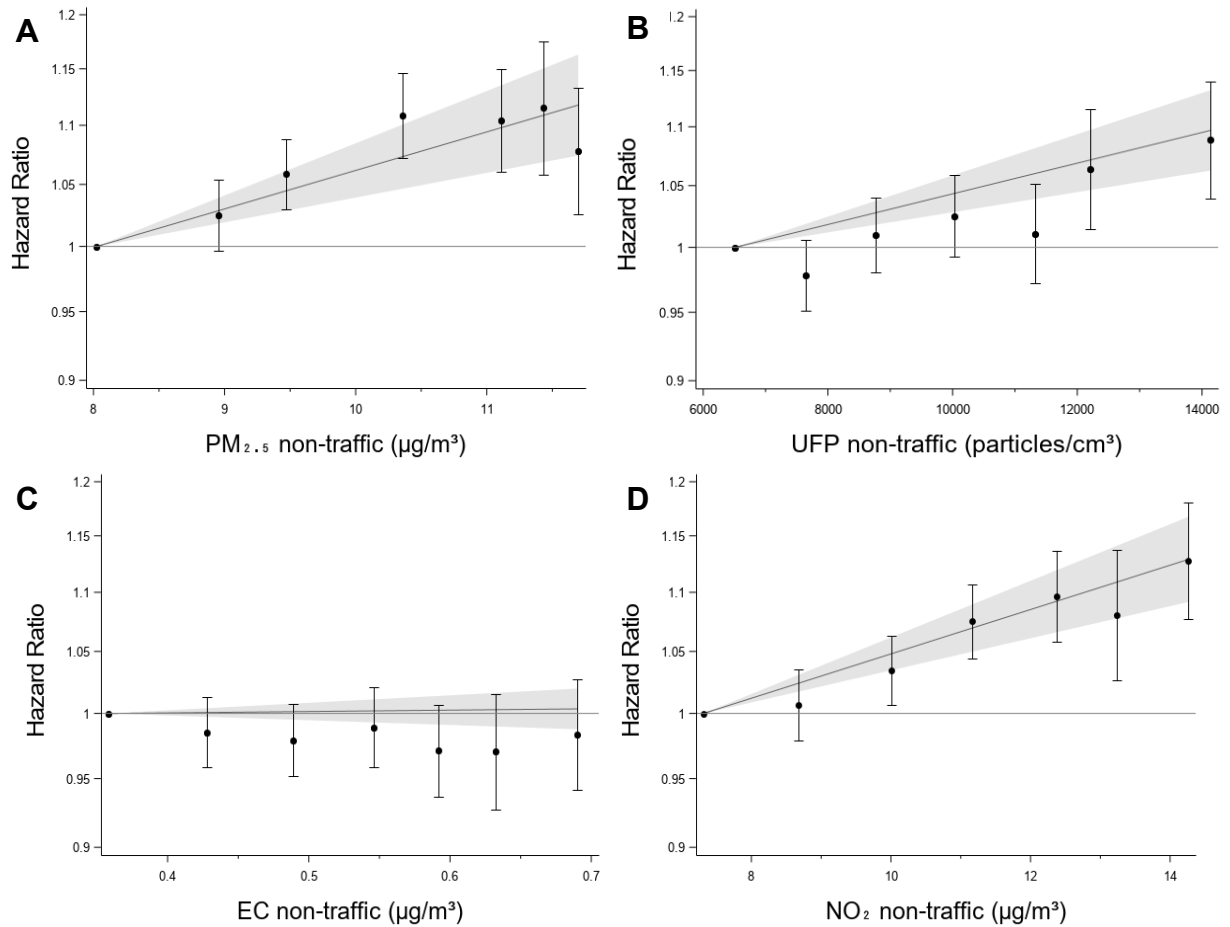

**Figure S4 a-d.** Associations between MI and 5-year time weighted averages of PM<sub>2.5</sub> (A), UFP (B), EC (C) and NO<sub>2</sub> (D) from non-traffic sources, specified both in categories and as linear variables in the fully adjusted model 3 (Adjusted for age, sex, calendar period, marital status, education, occupational status, ethnicity, personal and household income and percentage of parish population: living in social housing, being sole providers, of non-western origin, having low income, being unemployed, having blue collar work, having only basic education and having a criminal record) Categories defined from percentiles of exposure: <10% (reference), 10-25%, 25-50%, 50-75%, 75-90%, 90-95% and >95%, HRs and 95% confidence intervals are plotted at the median of each category. The linear estimates from Table 2 with 95% confidence intervals are plotted with the median of the categorical reference category as the null (i.e. =1). (Table S7 holds the same information in tabulated form).

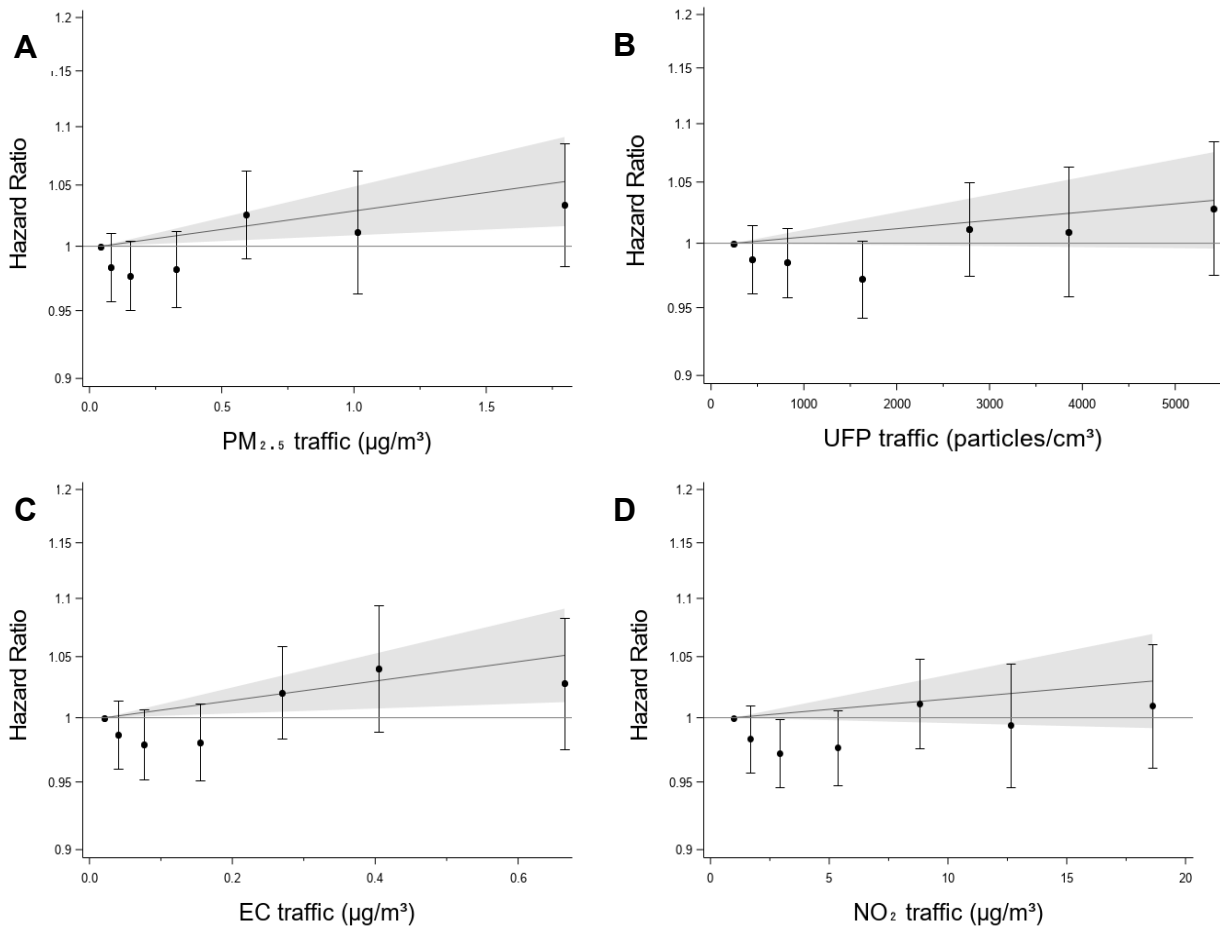

**Figure S5 a-d.** Associations between MI and 5-year time weighted averages of PM<sub>2.5</sub> (A), UFP (B), EC (C) and NO<sub>2</sub> (D) from traffic sources, specified both in categories and as linear variables in the fully adjusted model 3 (Adjusted for age, sex, calendar period, marital status, education, occupational status, ethnicity, personal and household income and percentage of parish population: living in social housing, being sole providers, of non-western origin, having low income, being unemployed, having blue collar work, having only basic education and having a criminal record). Categories defined from percentiles of exposure: <10% (reference), 10-25%, 25-50%, 50-75%, 75-90%, 90-95% and >95%, HRs and 95% confidence intervals are plotted at the median of each category. The linear estimates from Table 2 with 95% confidence intervals are plotted with the median of the categorical reference category as the null (i.e. =1). (Table S7 holds the same information in tabulated form).

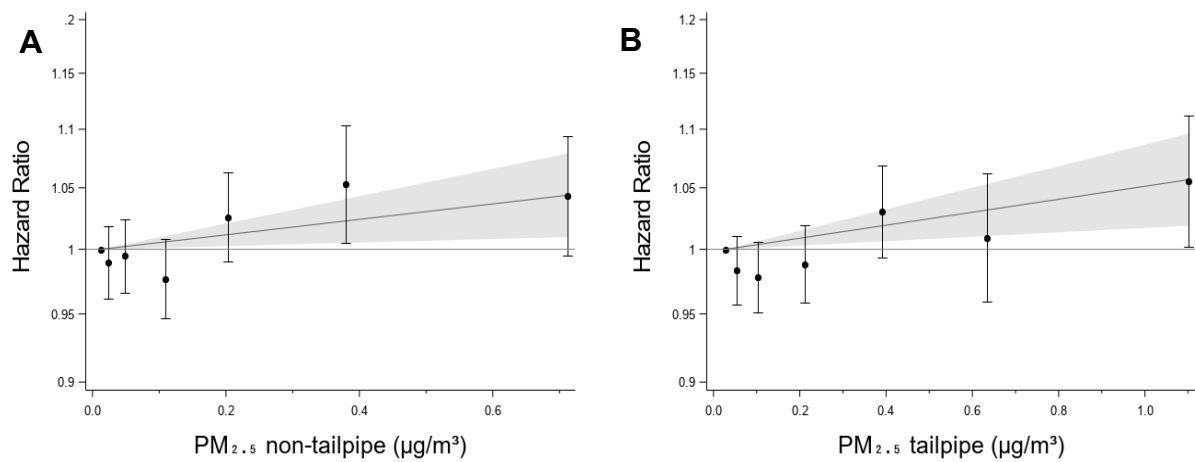

**Figure S6 a-b.** Associations between MI and 5-year time weighted averages of PM<sub>2.5</sub> from non-tailpipe (A) and tailpipe sources (B), specified both in categories and as linear variables in the fully adjusted model 3 (Adjusted for age, sex, calendar period, marital status, education, occupational status, ethnicity, personal and household income and percentage of parish population: living in social housing, being sole providers, of non-western origin, having low income, being unemployed, having blue collar work, having only basic education and having a criminal record). Categories defined from percentiles of exposure: <10% (reference), 10-25%, 25-50%, 50-75%, 75-90%, 90-95% and >95%, HRs and 95% confidence intervals are plotted at the median of each category. The linear estimates from Table 2 with 95% confidence intervals are plotted with the median of the categorical reference category as the null (i.e. =1). (Table S8 holds the same information in tabulated form).

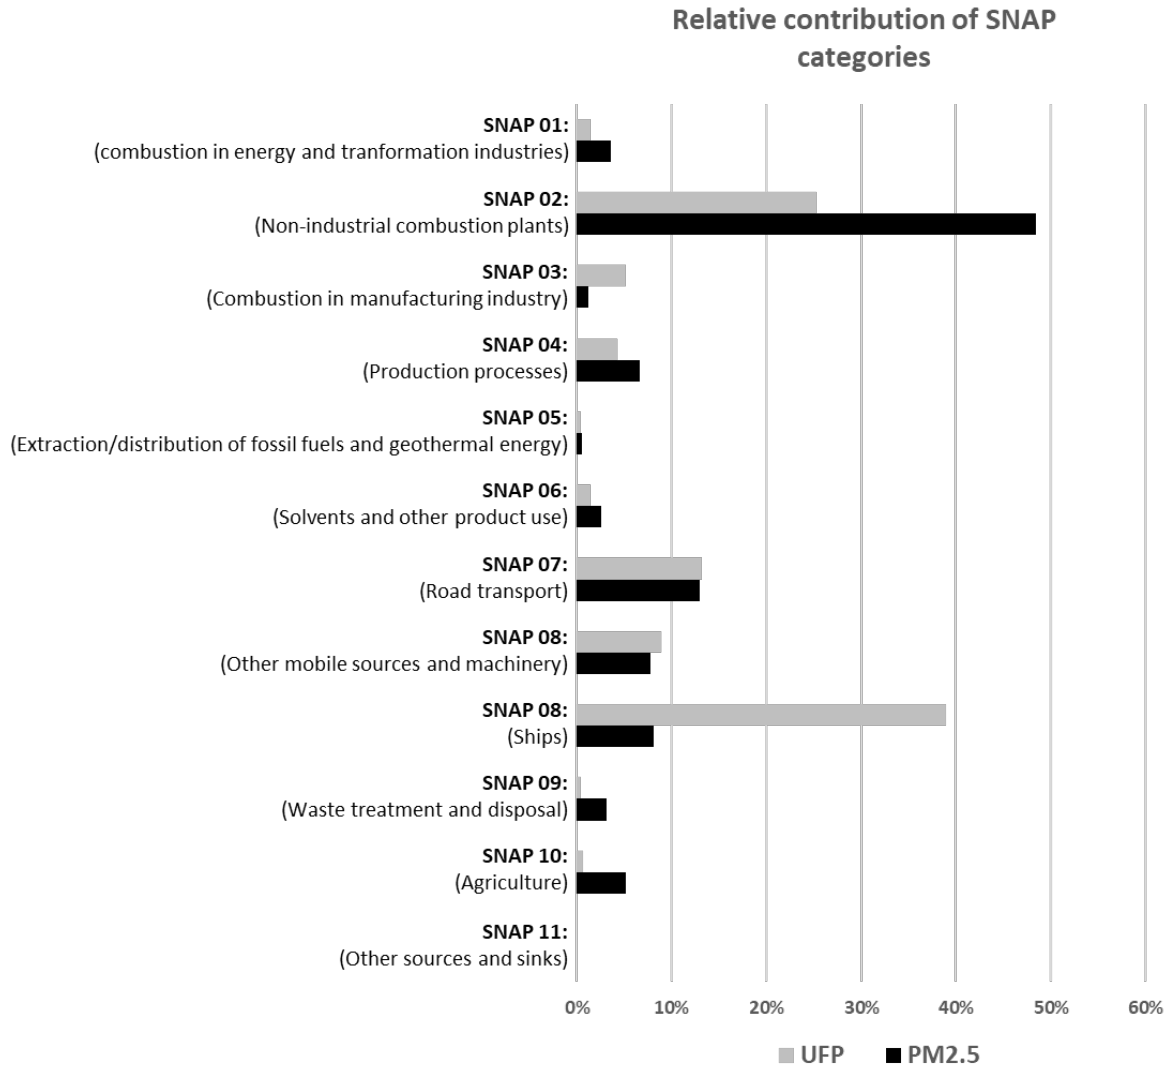

**Figure S7.** Contributions from different SNAP source categories to Danish air pollution in 2010. Note that contributions from ships have been singled out from SNAP 08: Other mobile sources and machinery.<sup>2-4</sup>

## References

1. Environment and Energy, 208 pp. Technical Report No. 215. <http://dce2.au.dk/pub/TR215.pdf>
2. European Monitoring and Evaluation Programme. <https://www.ceip.at/webdab-emission-database> [accessed May 5 2022]
3. Geels, C, Winther, M, Andersson, C, Jalkanen, J-P, Brandt, J, Frohn, LM, Im, U, Leung, W & Christensen, JH. 2021. Projections of shipping emissions and the related impact on air pollution and human health in the Nordic region. *Atmospheric Chemistry and Physics* 21: 12495-12519. <https://doi.org/10.5194/acp-21-12495-2021>
4. Plejdrup, M.S., Nielsen, O.-K., Gyldenkærne, S. & Bruun, H.G. 2021. Spatial high-resolution distribution of emissions to air – SPREAD 3.0. Aarhus University, DCE – Danish. Centre for
