# Supplementary material
Source: PubMed Central journal article supplement (PMC10217353)
Supplement: ehp10556.smcontents.508.pdf [file ehp10556.smcontents.508.pdf]

**Note to readers with disabilities:** *EHP* strives to ensure that all journal content is accessible to all readers. However, some figures and Supplemental Material published in *EHP* articles may not conform to [508 standards](#) due to the complexity of the information being presented. If you need assistance accessing journal content, please contact [ehp508@niehs.nih.gov](mailto:ehp508@niehs.nih.gov). Our staff will work with you to assess and meet your accessibility needs within 3 working days.

### **Supplemental Material**

#### **Source-Specific Air Pollution Including Ultrafine Particles and Risk of Myocardial Infarction: A Nationwide Cohort Study from Denmark**

Aslak Harbo Poulsen, Mette Sørensen, Ulla Arthur Hvidtfeldt, Jesper H. Christensen, Jørgen Brandt, Lise Marie Frohn, Matthias Ketznel, Christopher Andersen, and Ole Raaschou-Nielsen

#### **Table of Contents**

**Table S1.** Main categories of the Selected Nomenclature for Air Pollution (SNAP) classification used in the Danish emission inventory.

**Table S2.** Cohort (N=1,964,702) characteristics at baseline (last of: 1 January 2005 and age 50 years), above and below median of PM<sub>2.5</sub> and UFP concentration over previous 5 years, in Denmark, 2005-2017.

**Table S3.** Spearman rank correlations between 5-year time weighted average air pollution concentration at residences of all cohort members, Denmark, 2005-2017, N=1,964,702.

**Table S4.** Spearman rank correlations between area level socioeconomic factors and individual socioeconomic factors and air pollutant concentrations. Air pollution is 5-year time weighted average air pollution concentration at residences of each cohort member. Denmark, 2005-2017, N=1,964,702.

**Table S5.** Spearman rank correlations between 1, 5 and 10-year average air pollution concentration at residential addresses of all cohort members. Denmark, 2005-2017, N=1,964,702.

**Table S6.** Linear associations between MI and air pollutants, total and by source, per fixed unit. Fully adjusted model 3. Denmark, 2005-2017, N=1,964,702.

**Table S7.** Associations between MI and categories of air pollutants concentration: overall and by traffic or non-traffic sources. Denmark, 2005-2017, N=1,964,702.

**Table S8.** Associations between MI and categories of PM<sub>2.5</sub> from traffic, traffic-tailpipe and traffic-non-tailpipe. Denmark, 2005-2017, N=1,964,702.

**Table S9.** Akaike Information Criterion (AIC) analyses, comparing model fit of fully adjusted models (model 3) including five year average air pollutants either linearly or categorically. Model adjusted for age, sex, calendar period, marital status, education, occupational status, ethnicity, personal and household income and percentage of parish population: living in social housing, being sole providers, of non-western origin, having low income, being unemployed, having blue collar work, having only basic education and having a criminal record.

**Table S10.** Associations between air pollutants and MI; exposure calculated as running averages over the past 1, 5 and 10 years, expressed per IQR and per fixed unit increments. Denmark, 2005-2017, N=1,964,702.

**Table S11.** Sensitivity analysis of associations between MI (cases=71,285) and 5-year averages of air pollutants, total and by source. Denmark, 2005-2017, N=1,964,702. Person years: 18,309,319

**Table S12.** Annual contributions from different SNAP source categories to Danish air pollution in 2010. Note that contributions from ships have been singled out from SNAP 08: Other mobile sources and machinery.

**Figure S1.** Modelled (purple) and measured (red) UFP and NO<sub>2</sub> concentrations as average time variation at three timescales (day, year, week) at the street station HCAB (Copenhagen, Denmark, dense traffic, 2002-2016).

**Figure S2.** Year of entry for all cohort members. Year 2005 or age 50, whichever came first.

**Figure S3.** Distribution of PM<sub>2.5</sub>, UFP, BC and NO<sub>2</sub> concentrations as 5-year average over addresses held 2010 to 2014, by source: Danish road traffic versus other sources.

**Figure S4 a-d.** Associations between MI and 5-year time weighted averages of PM<sub>2.5</sub> (A), UFP (B), EC (C) and NO<sub>2</sub> (D) from non-traffic sources, specified both in categories and as linear variables in the fully adjusted model 3 (Adjusted for age, sex, calendar period, marital status, education, occupational status, ethnicity, personal and household income and percentage of parish population: living in social housing, being sole providers, of non-western origin, having low income, being unemployed, having blue collar work, having only basic education and having a criminal record) Categories defined from percentiles of exposure: <10% (reference), 10-25%, 25-50%, 50-75%, 75-90%, 90-95% and >95%, HRs and 95% confidence intervals are plotted at the median of each category. The linear estimates from Table 2 with 95% confidence intervals are plotted with the median of the categorical reference category as the null (i.e. =1). (Table S7 holds the same information in tabulated form).

**Figure S5 a-d.** Associations between MI and 5-year time weighted averages of PM<sub>2.5</sub> (A), UFP (B), EC (C) and NO<sub>2</sub> (D) from traffic sources, specified both in categories and as linear variables in the fully adjusted model 3 (Adjusted for age, sex, calendar period, marital status, education, occupational status, ethnicity, personal and household income and percentage of parish population: living in social housing, being sole providers, of non-western origin, having low income, being unemployed, having blue collar work, having only basic education and having a criminal record). Categories defined from percentiles of exposure: <10% (reference), 10-25%, 25-50%, 50-75%, 75-90%, 90-95% and >95%, HRs and 95% confidence intervals are plotted at the median of each category. The linear estimates from Table 2 with 95% confidence intervals are plotted with the median of the categorical reference category as the null (i.e. =1). (Table S7 holds the same information in tabulated form).

**Figure S6 a-b.** Associations between MI and 5-year time weighted averages of PM<sub>2.5</sub> from non-tailpipe (A) and tailpipe sources (B), specified both in categories and as linear variables in the fully adjusted model 3 (Adjusted for age, sex, calendar period, marital status, education, occupational status, ethnicity, personal and household income and percentage of parish population: living in social housing, being sole providers, of non-western origin, having low income, being unemployed, having blue collar work, having only basic education and having a criminal record). Categories defined from percentiles of exposure: <10% (reference), 10-25%, 25-50%, 50-75%, 75-90%, 90-95% and >95%, HRs and 95% confidence intervals are plotted at the median of each category. The linear estimates from Table 2 with 95% confidence intervals are plotted with the median of the categorical reference category as the null (i.e. =1). (Table S8 holds the same information in tabulated form).

**Figure S7.** Contributions from different SNAP source categories to Danish air pollution in 2010. Note that contributions from ships have been singled out from SNAP 08: Other mobile sources and machinery.

## References
